# Supplementary material for: Mechanistic study of the ceria supported, re-catalyzed deoxydehydration of vicinal OH groups
Source: Royal Society of Chemistry journal article supplement (doi:10.1039/c8cy01782d), 2018-01-01
Supplement: c8cy01782d1.xlsx [file c8cy01782d1.xlsx]

## Sheet: Path a-b
1	1	1	1	1	1	1	1	1	1	1	1	1	1	1	1	1
-(b(1)+f(2))	b(2)	0	0	0	0	0	0	0	0	0	0	0	f(1)	0	0	0
f(2)	-(b(2)+f(3))	b(3)	0	0	0	0	0	0	0	0	0	0	0	0	0	0
0	f(3)	-b(3)-f(4)	b(4)	0	0	0	0	0	0	0	0	0	0	0	0	0
0	0	f(4)	-b(4)-f(5)	b(5)	0	0	0	0	0	0	0	0	0	0	0	0
0	0	0	f(5)	-b(5)-f(6)	b(6)	0	0	0	0	0	0	0	0	0	0	0
0	0	0	0	f(6)	-b(6)-f(7)-f(20)	b(7)	0	0	0	0	0	0	0	b(20)	0	0
0	0	0	0	0	f(6)	-b(7)-f(8)-f(11)	b(8)	0	0	b(11)	0	0	0	0	0	0
0	0	0	0	0	0	f(8)	-b(8)-f(9)-b(13)	b(9)	0	0	f(13)	0	0	0	0	0
0	0	0	0	0	0	0	f(9)	-b(9)-f(10)	b(10)	0	0	0	0	0	0	0
0	0	0	0	0	0	0	0	f(10)	-b(10)-f(14)	0	0	b(14)	0	0	0	0
0	0	0	0	0	0	f(11)	0	0	0	-b(11)-f(12)	b(12)	0	0	0	0	0
0	0	0	0	0	0	0	b(13)	0	0	f(12)	-b(12)-f(13)	0	0	0	0	0
0	0	0	0	0	0	0	0	0	f(14)	0	0	-b(14)-f(15)	b(15)	0	0	0
b(1)	0	0	0	0	0	0	0	0	0	0	0	f(15)	-f(1)-b(15)-b(22)	0	f(22)	0
0	0	0	0	0	f(20)	0	0	0	0	0	0	0	0	-b(20)-f(21)	b(21)	0
0	0	0	0	0	0	0	0	0	0	0	0	0	b(22)	f(21)	-b(21)-f(22)	0

## Sheet: Path c
1	1	1	1	1	1	1	1	1	1	1	1
-(b(1)+f(2))	b(2)	0	0	0	0	0	0	0	0	f(1)	0
f(2)	-(b(2)+f(3))	b(3)	0	0	0	0	0	0	0	0	0
0	f(3)	-b(3)-f(4)	b(4)	0	0	0	0	0	0	0	0
0	0	f(4)	-b(4)-f(5)	b(5)	0	0	0	0	0	0	0
0	0	0	f(5)	-b(5)-f(6)	b(6)	0	0	0	0	0	0
0	0	0	0	f(6)	-b(6)-f(7)	b(7)	0	0	0	0	0
0	0	0	0	0	f(7)	-b(7)-f(16)	b(16)	0	0	0	0
0	0	0	0	0	0	f(16)	-b(16)-f(17)	b(17)	0	0	0
0	0	0	0	0	0	0	f(17)	-b(17)-f(18)	b(18)	0	0
0	0	0	0	0	0	0	0	f(18)	-b(18)-f(19)	b(19)	0
b(1)	0	0	0	0	0	0	0	0	f(19)	-b(19)-f(1)	0

## Sheet: Path-d,e,f,g
1	1	1	1	1	1	1	1	1	1	1	1	1	1	1	1	1	1	1	1	1	1	1	1	1	1	1	1
-(b(1)+f(2))	b(2)	0	0	0	0	0	0	0	0	0	0	0	0	0	0	0	0	0	0	0	f(1)	0	0	0	0	0	0
f(2)	-(b(2)+f(3))	b(3)	0	0	0	0	0	0	0	0	0	0	0	0	0	0	0	0	0	0	0	0	0	0	0	0	0
0	f(3)	-b(3)-f(4)	b(4)	0	0	0	0	0	0	0	0	0	0	0	0	0	0	0	0	0	0	0	0	0	0	0	0
0	0	f(4)	-b(4)-f(5)	b(5)	0	0	0	0	0	0	0	0	0	0	0	0	0	0	0	0	0	0	0	0	0	0	0
0	0	0	f(5)	-b(5)-f(6)	b(6)	0	0	0	0	0	0	0	0	0	0	0	0	0	0	0	0	0	0	0	0	0	0
0	0	0	0	f(6)	-b(6)-f(7)	b(7)	0	0	0	0	0	0	0	0	0	0	0	0	0	0	0	0	0	0	0	0	0
0	0	0	0	0	f(7)	-b(7)-f(8)-f(28)	b(8)	0	0	0	0	0	0	0	0	0	0	0	0	0	0	0	0	0	b(28)	0	0
0	0	0	0	0	0	f(8)	-b(8)-f(9)-f(24)	b(9)	0	0	0	0	0	0	0	0	0	0	0	0	0	b(24)	0	0	0	0	0
0	0	0	0	0	0	0	f(9)	-b(9)-f(10)	b(10)	0	0	0	0	0	0	0	0	0	0	0	0	0	0	0	0	0	0
0	0	0	0	0	0	0	0	f(10)	-b(10)-f(11)	b(11)	0	0	0	0	0	0	0	0	0	0	0	0	0	0	0	0	0
0	0	0	0	0	0	0	0	0	f(11)	-b(11)-f(12)	b(12)	0	0	0	0	0	0	0	0	0	0	0	0	0	0	0	0
0	0	0	0	0	0	0	0	0	0	f(12)	-b(12)-f(13)	b(13)	0	0	0	0	0	0	0	0	0	0	0	0	0	0	0
0	0	0	0	0	0	0	0	0	0	0	f(13)	-b(13)-f(14)-f(16)	b(14)	b(16)	0	0	0	0	0	0	0	0	0	0	0	0	0
0	0	0	0	0	0	0	0	0	0	0	0	f(14)	-b(14)-f(15)	0	0	0	0	0	0	0	b(15)	0	0	0	0	0	0
b(1)	0	0	0	0	0	0	0	0	0	0	0	0	f(15)	0	0	0	0	0	0	f(23)	-b(15)-f(1)-b(23)-b(27)-b(30)	0	0	f(27)	0	f(30)	0
0	0	0	0	0	0	0	0	0	0	0	0	f(16)	0	-b(16)-f(17)	b(17)	0	0	0	0	0	0	0	0	0	0	0	0
0	0	0	0	0	0	0	0	0	0	0	0	0	0	f(17)	-b(17)-f(18)	b(18)	0	0	0	0	0	0	0	0	0	0	0
0	0	0	0	0	0	0	0	0	0	0	0	0	0	0	f(18)	-b(18)-f(19)	b(19)	0	0	0	0	0	0	0	0	0	0
0	0	0	0	0	0	0	0	0	0	0	0	0	0	0	0	f(19)	-b(19)-f(20)	b(20)	0	0	0	0	0	0	0	0	0
0	0	0	0	0	0	0	0	0	0	0	0	0	0	0	0	0	f(20)	-b(20)-f(21)	b(21)	0	0	0	0	0	0	0	0
0	0	0	0	0	0	0	0	0	0	0	0	0	0	0	0	0	0	f(21)	-b(21)-f(22)	b(22)	0	0	0	0	0	0	0
0	0	0	0	0	0	0	0	0	0	0	0	0	0	0	0	0	0	0	f(22)	-b(22)-f(23)	b(23)	0	0	0	0	0	0
0	0	0	0	0	0	0	f(24)	0	0	0	0	0	0	0	0	0	0	0	0	0	0	-b(24)-f(25)	b(25)	0	0	0	0
0	0	0	0	0	0	0	0	0	0	0	0	0	0	0	0	0	0	0	0	0	0	f(25)	-b(25)-f(26)	b(26)	0	0	0
0	0	0	0	0	0	0	0	0	0	0	0	0	0	0	0	0	0	0	0	0	b(27)	0	f(26)	-b(26)-f(27)	0	0	0
0	0	0	0	0	0	f(28)	0	0	0	0	0	0	0	0	0	0	0	0	0	0	0	0	0	0	-b(28)-f(29)	b(29)	0
0	0	0	0	0	0	0	0	0	0	0	0	0	0	0	0	0	0	0	0	0	b(30)	0	0	0	f(29)	-b(29)-f(30)	0
